# Supplementary material
Source: ML conference proceedings conference paper supplement (https://openaccess.thecvf.com/content/CVPR_2019/html/Moltisanti_Action_Recognition_From_CVPR_2019_paper.html)
Supplement: Supplementary file 1 [file Moltisanti_Action_Recognition_From_CVPR_2019_supplemental.pdf]

Archive with 1 entries (1 files):
- 4560.mp4
